# Supplementary material
Source: PubMed Central journal article supplement (PMC2745965)
Supplement: NIHMS95119-supplement-1_si_001.pdf [file NIHMS95119-supplement-1_si_001.pdf]

## Supporting Information

**Table S1.** Ranges of the Mössbauer parameters for the complex **1**

|                       | Site 1      | Site 2 & 3    | Site 4      |
|-----------------------|-------------|---------------|-------------|
| $\eta$                | 0 - 0.2     | 0 - 0.5       | 0.4 - 0.7   |
| $\beta_{\text{efg}}$  | 75 - 105    | 100 - 110     | 85 - 95     |
| $\gamma_{\text{efg}}$ | free        | free          | 70 - 110    |
| $A_x$ (KG)            | -80 - (-70) | - 101 - (-95) | 15 - 0      |
| $A_y$ (KG)            | -80 - (-30) | - 77 - (-37)  | 60 - 50     |
| $A_z$ (KG)            | -67 - (-66) | - 71 - (-69)  | 28.5 - 29.5 |

**Table S2.** Fe-Fe distances in all-ferrous cluster in *Av2* and complex **1**

|             | Fe <sub>i</sub> Fe <sub>j</sub> (Å) |                  |
|-------------|-------------------------------------|------------------|
| <i>i, j</i> | protein <sup>a</sup>                | complex <b>1</b> |
| 1,4         | 2.793                               | 2.719            |
| 2,4         | 2.674                               | 2.709            |
| 3,4         | 2.693                               | 2.764            |
| av.         | <b>2.720</b>                        | <b>2.731</b>     |
| 1,2         | 2.573                               | 2.602            |
| 1,3         | 2.630                               | 2.674            |
| 2,3         | 2.516                               | 2.612            |
| av.         | <b>2.573</b>                        | <b>2.629</b>     |

<sup>a</sup> The sites of the nitrogenase cluster labeled Fe<sub>1</sub>, Fe<sub>2</sub>, Fe<sub>3</sub>, and Fe<sub>4</sub> correspond with the sites Fe(1), Fe(4), Fe(2), and Fe(3) in the PDB file 1G1M with the structure of the all-ferrous Fe-protein of *A. vinelandii*, respectively.

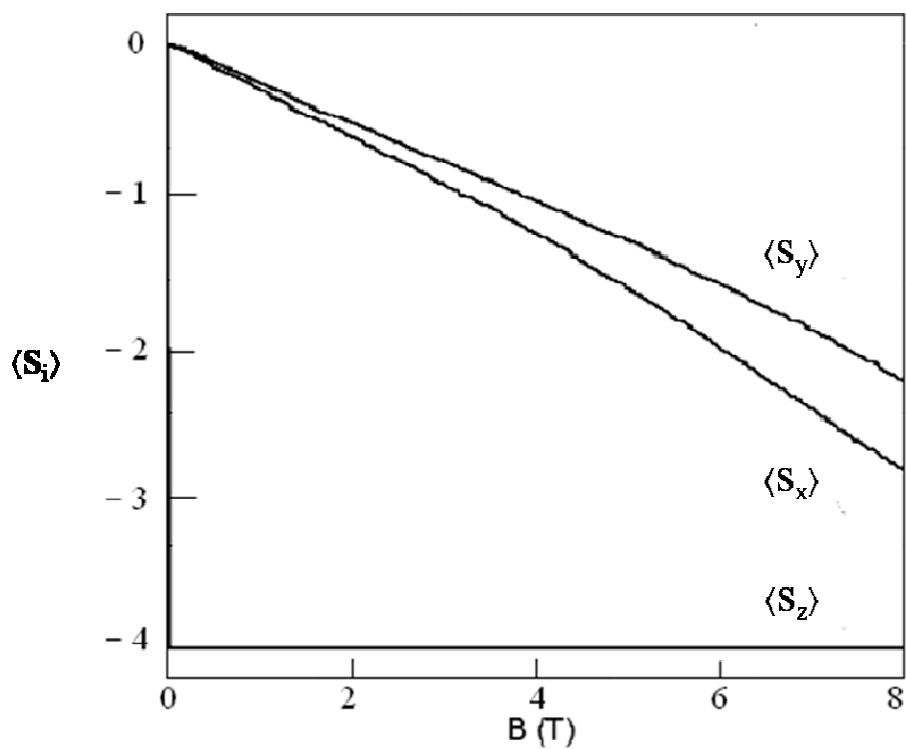

**Figure S1.** Spin expectation values,  $\langle S_i \rangle$ ,  $i = x, y$ , and  $z$ , for the lowest state of an  $S = 4$  multiplet obtained for a system with  $D = -1.9 \text{ cm}^{-1}$  and  $E/D = 0.07$ , as a function of the applied magnetic field indicated.

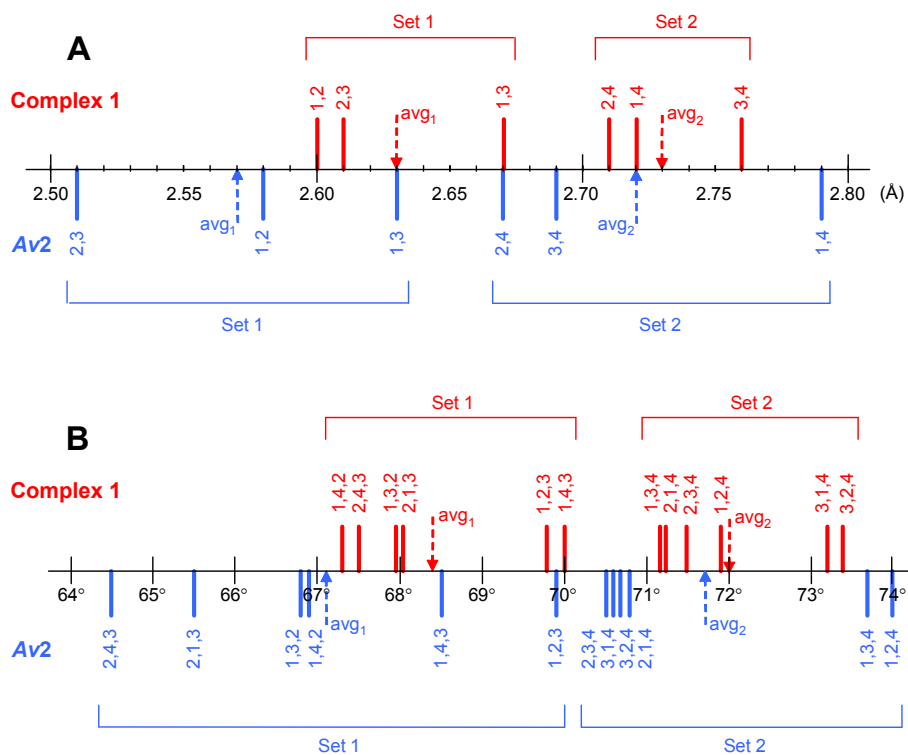

**Figure S2.** (A) Graphic representation of the Fe–Fe distances (Table S2) in the all-ferrous clusters of complex **1** (red) and *Av2* (blue). (B) Graphic representation of the Fe–S–Fe angles (Table 8) in the all-ferrous clusters of complex **1** (red) and *Av2* (blue). The averages (avg<sub>*i*</sub>) for the subsets (sets 1 and 2, see section 5.3) have been indicated by dashed arrows.
